# Supplementary material for: Phosphido-bis(borane) complexes of the alkaline earth metals
Source: Royal Society of Chemistry journal article supplement (doi:10.1039/d0dt03895d), 2020-12-23
Supplement: d0dt03895d1.pdf [file d0dt03895d1.pdf]

## Phosphido-Bis(Borane) Complexes of the Alkaline Earth Metals

Keith Izod,\* James M. Watson, Ross W. Harrington, William Clegg

*Main Group Chemistry Laboratories, School of Chemistry, Newcastle University, Newcastle upon Tyne, NE1 7RU, UK*

### SUPPORTING INFORMATION

|                                                                                                                                                                 |       |
|-----------------------------------------------------------------------------------------------------------------------------------------------------------------|-------|
| <b>Figures S1-S4.</b> $^1\text{H}$ , $^{13}\text{C}\{^1\text{H}\}$ , $^{11}\text{B}\{^1\text{H}\}$ and $^{31}\text{P}\{^1\text{H}\}$ NMR spectra of <b>2a</b> . | S2-S3 |
| <b>Figures S5-S8.</b> $^1\text{H}$ , $^{13}\text{C}\{^1\text{H}\}$ , $^{11}\text{B}\{^1\text{H}\}$ and $^{31}\text{P}\{^1\text{H}\}$ NMR spectra of <b>3</b> .  | S4-S5 |
| <b>Figures S9-S12.</b> $^1\text{H}$ , $^{13}\text{C}\{^1\text{H}\}$ , $^{11}\text{B}\{^1\text{H}\}$ and $^{31}\text{P}\{^1\text{H}\}$ NMR spectra of <b>4</b> . | S6-S7 |
| <b>Table S1.</b> Crystallographic data for <b>2a</b> , <b>2b</b> , <b>2c</b> , <b>3</b> , and <b>4</b> .                                                        | S8-S9 |

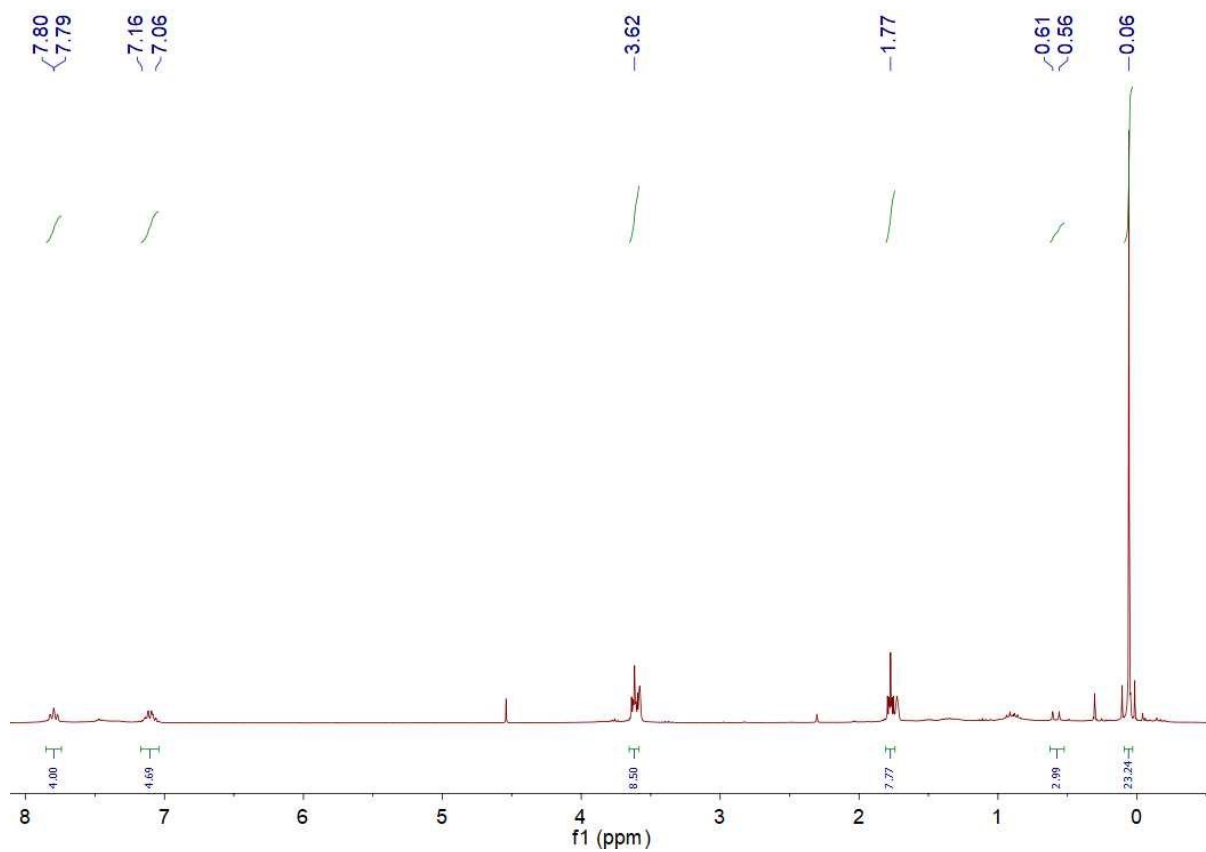

**Figure S1.**  $^1\text{H}$  NMR spectrum of **2a** in  $d_8$ -THF.

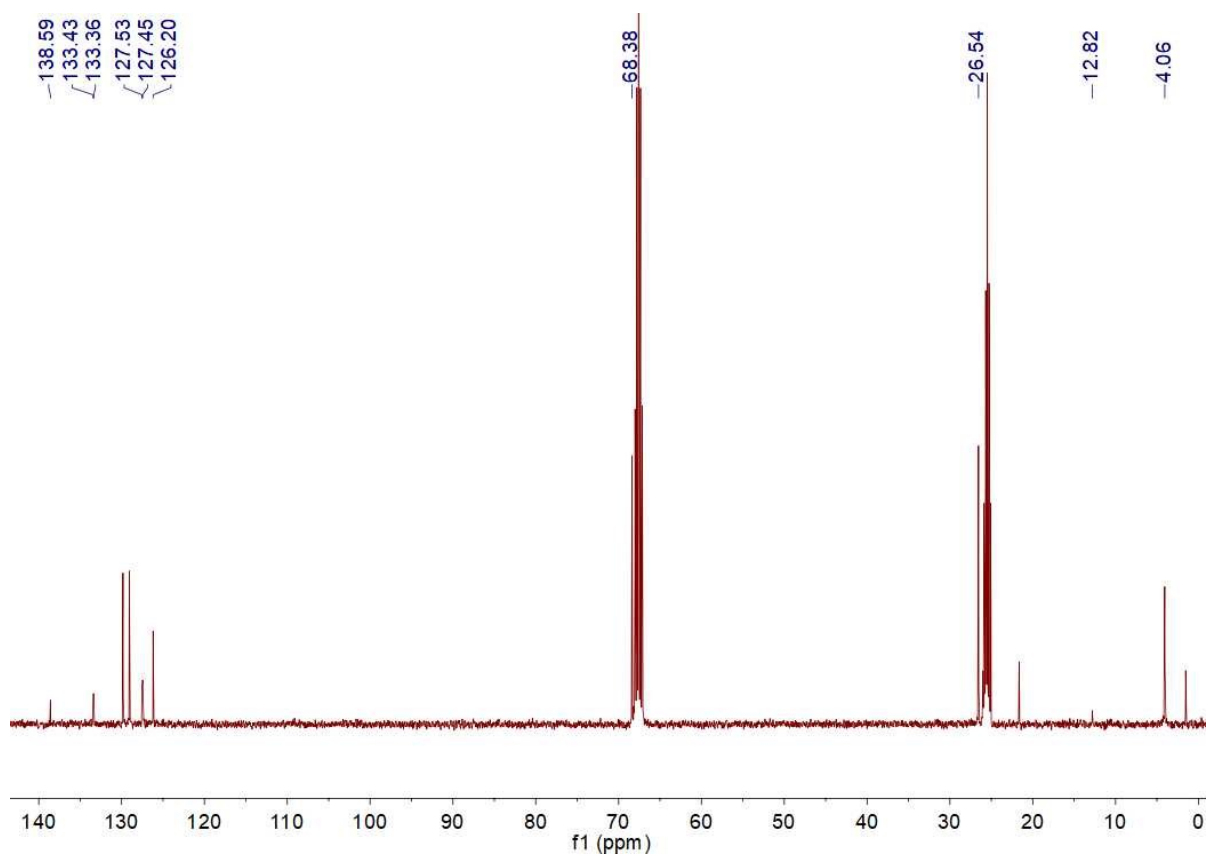

**Figure S2.**  $^{13}\text{C}\{^1\text{H}\}$  NMR spectrum of **2a** in  $d_8$ -THF.

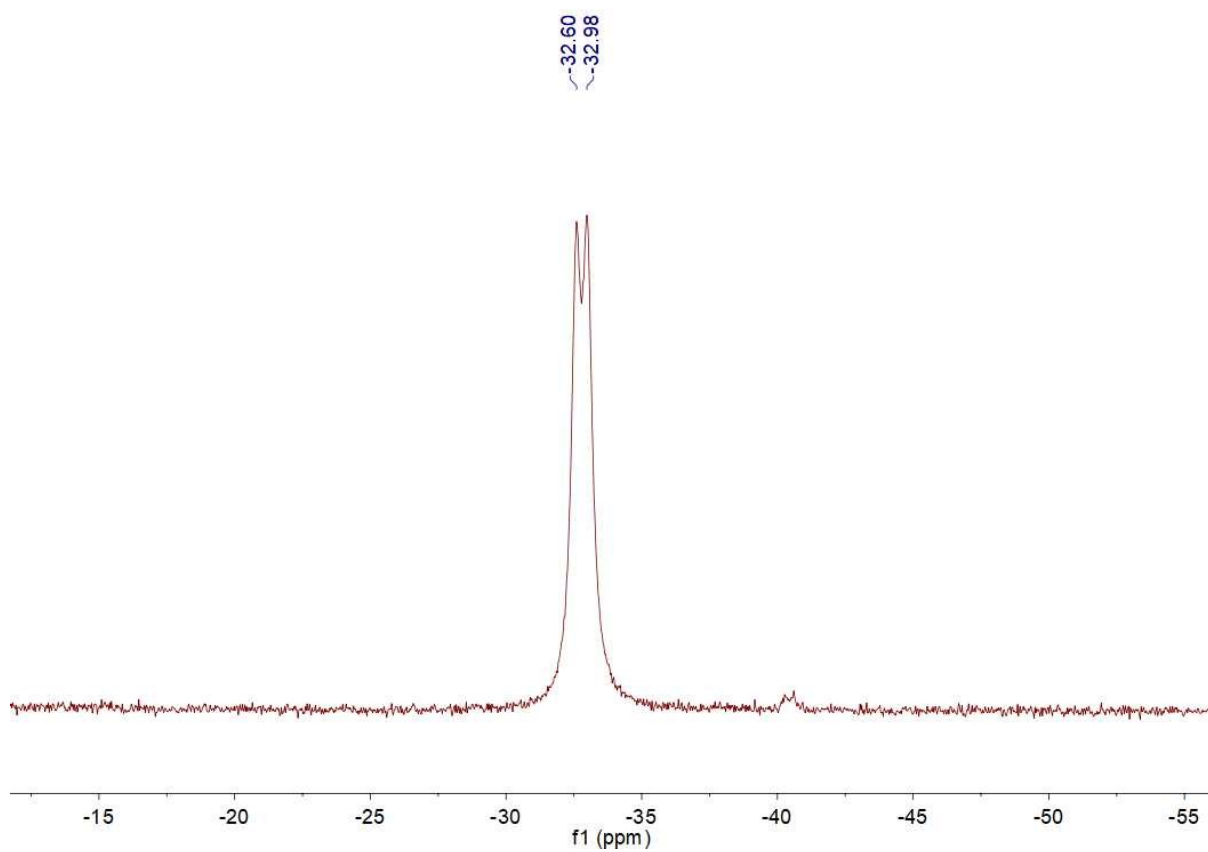

**Figure S3.**  $^{11}\text{B}\{^1\text{H}\}$  NMR spectrum of **2a** in  $d_8$ -THF.

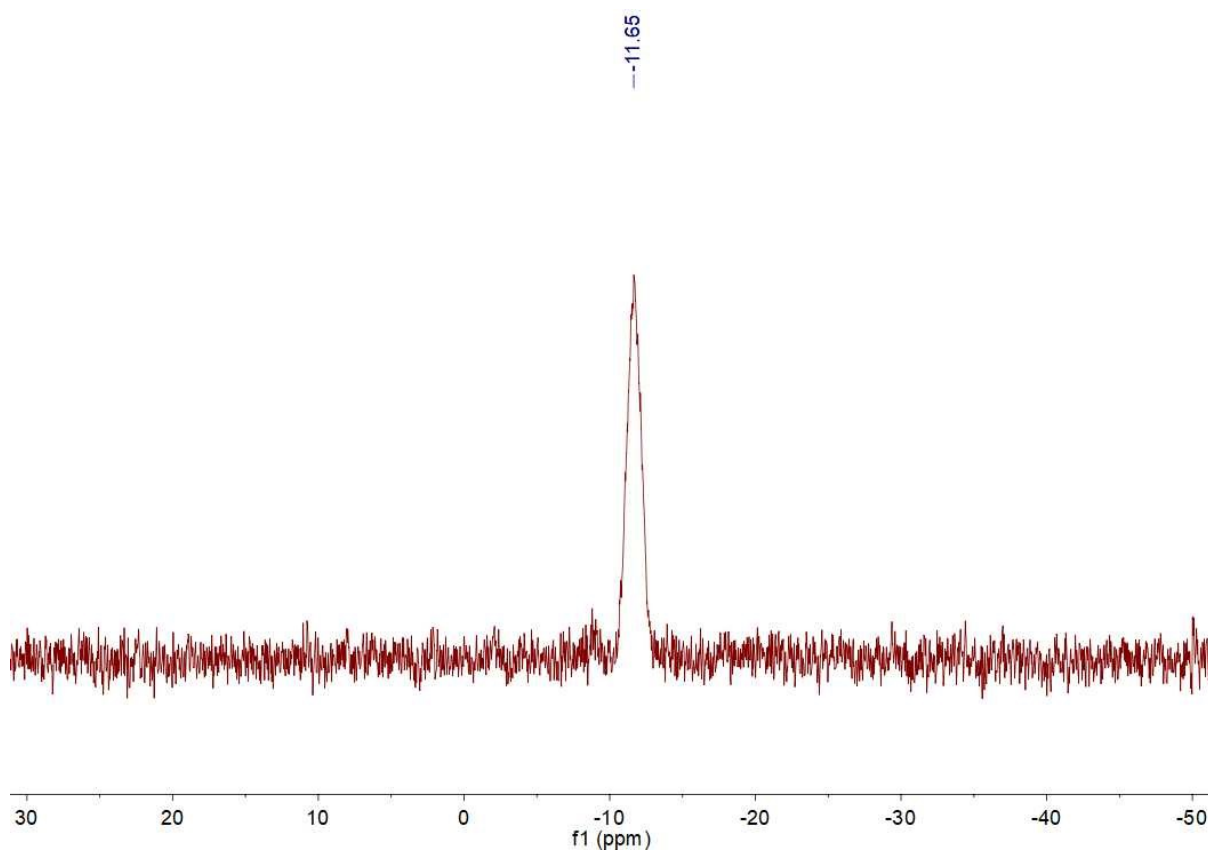

**Figure S4.**  $^{31}\text{P}\{^1\text{H}\}$  NMR spectrum of **2a** in  $d_8$ -THF.

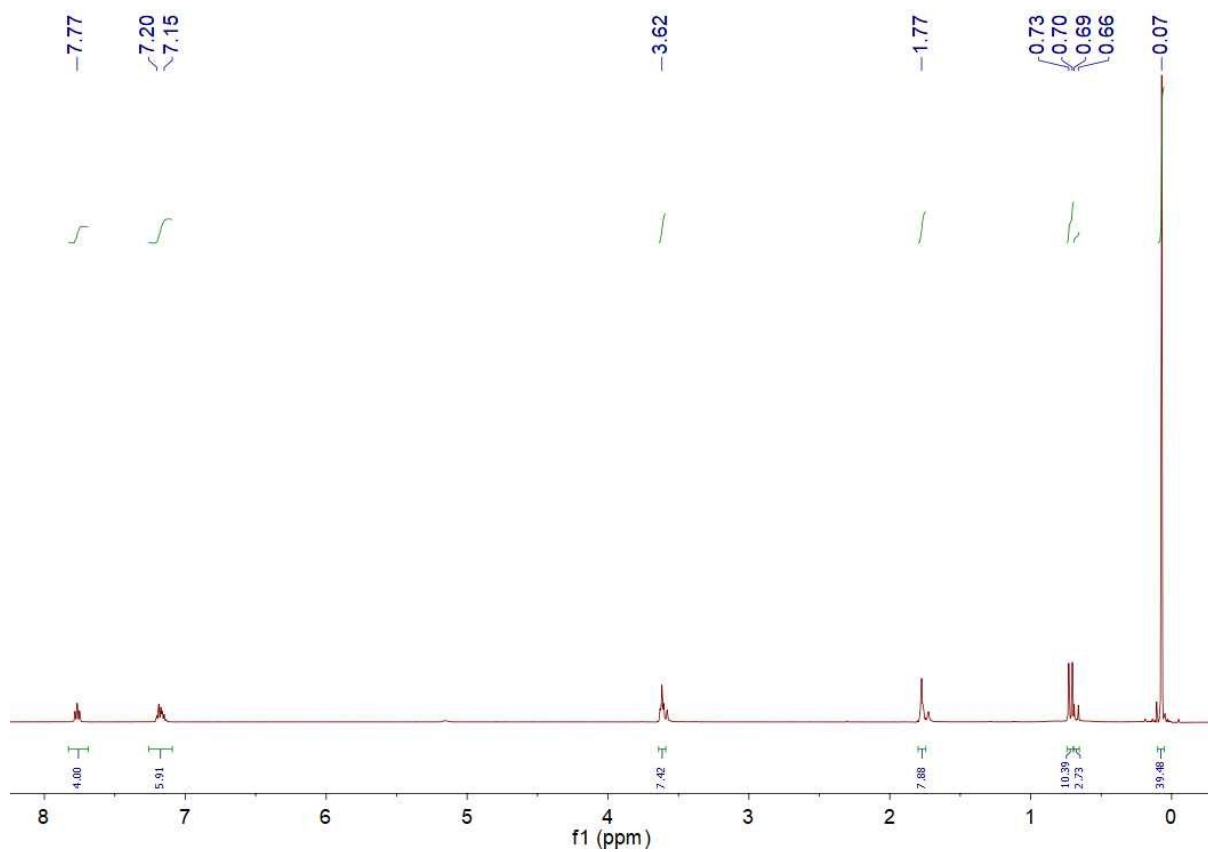

**Figure S5.**  $^1\text{H}\{^{11}\text{B}\}$  NMR spectrum of **3** in  $d_8$ -THF.

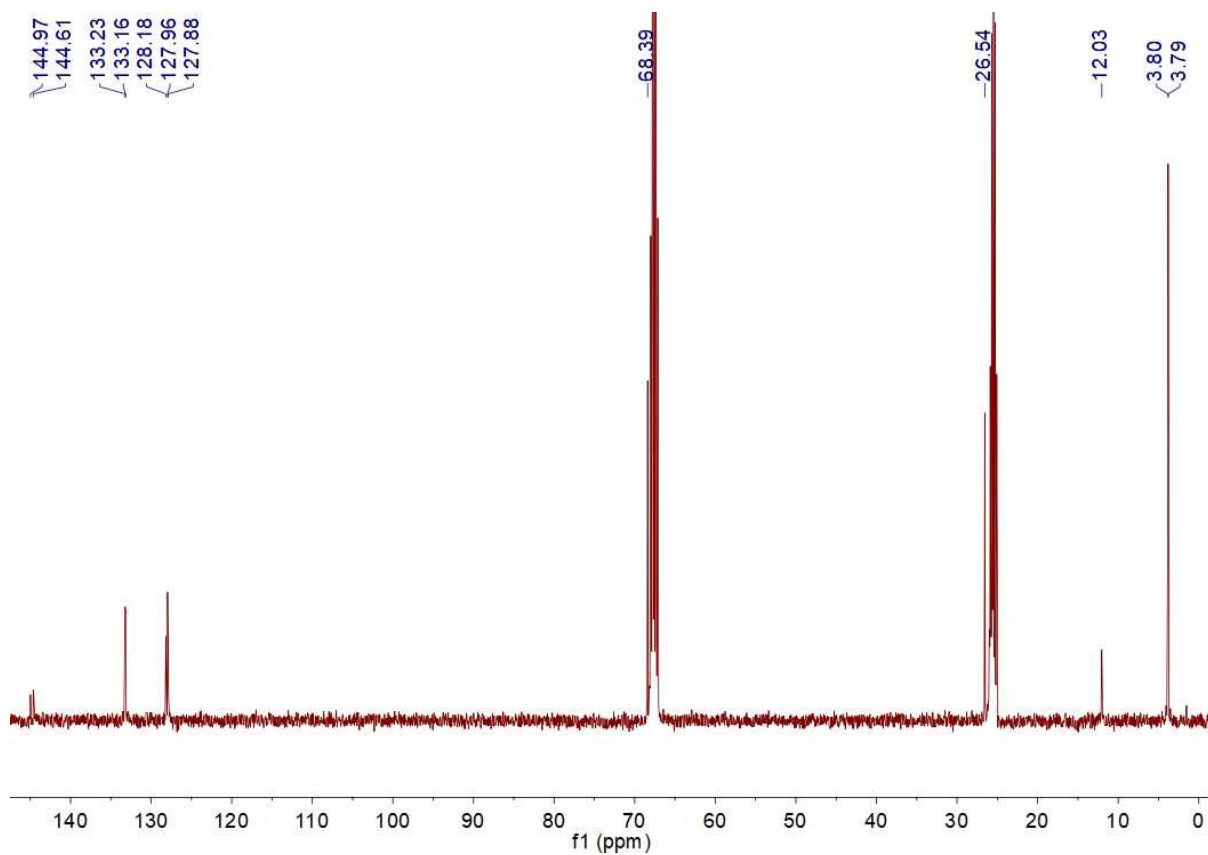

**Figure S6.**  $^{13}\text{C}\{^1\text{H}\}$  NMR spectrum of **3** in  $d_8$ -THF.

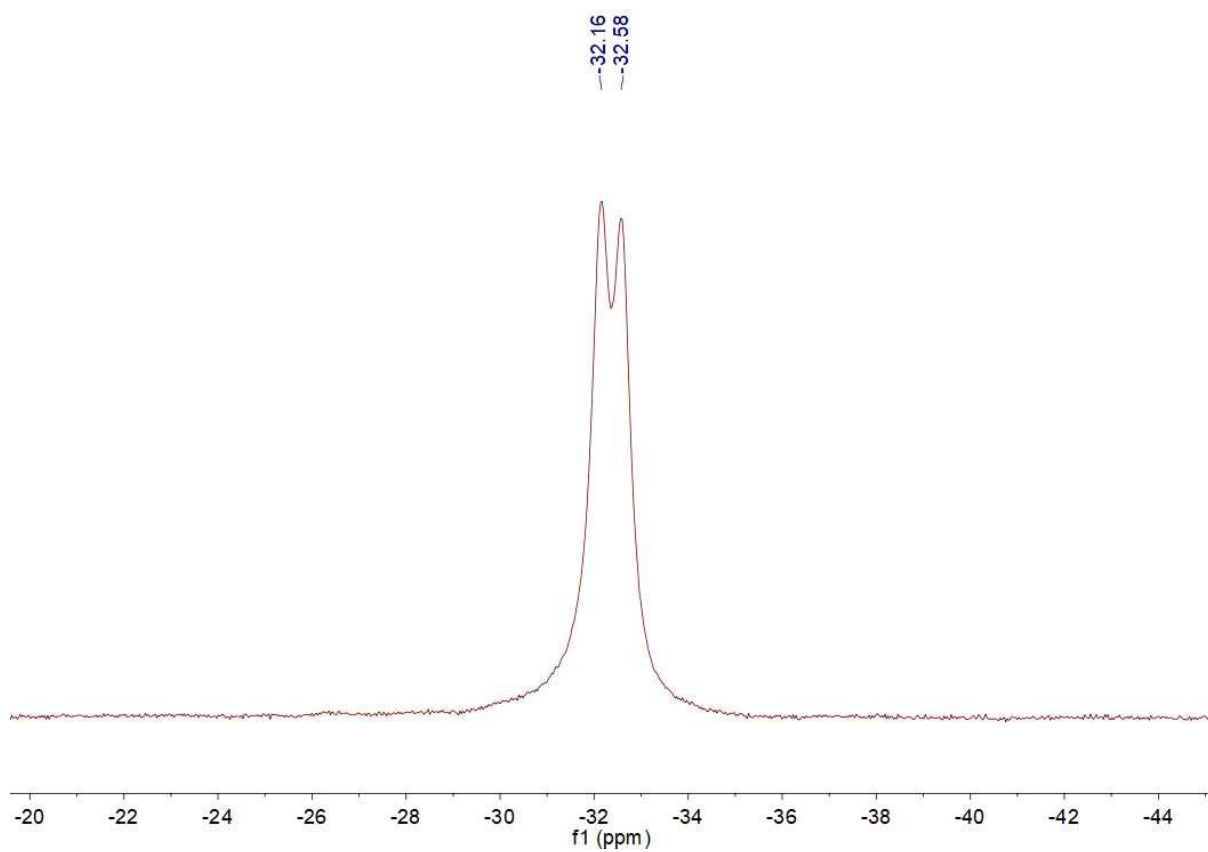

**Figure S7.**  $^{11}\text{B}\{^1\text{H}\}$  NMR spectrum of **3** in  $d_8$ -THF.

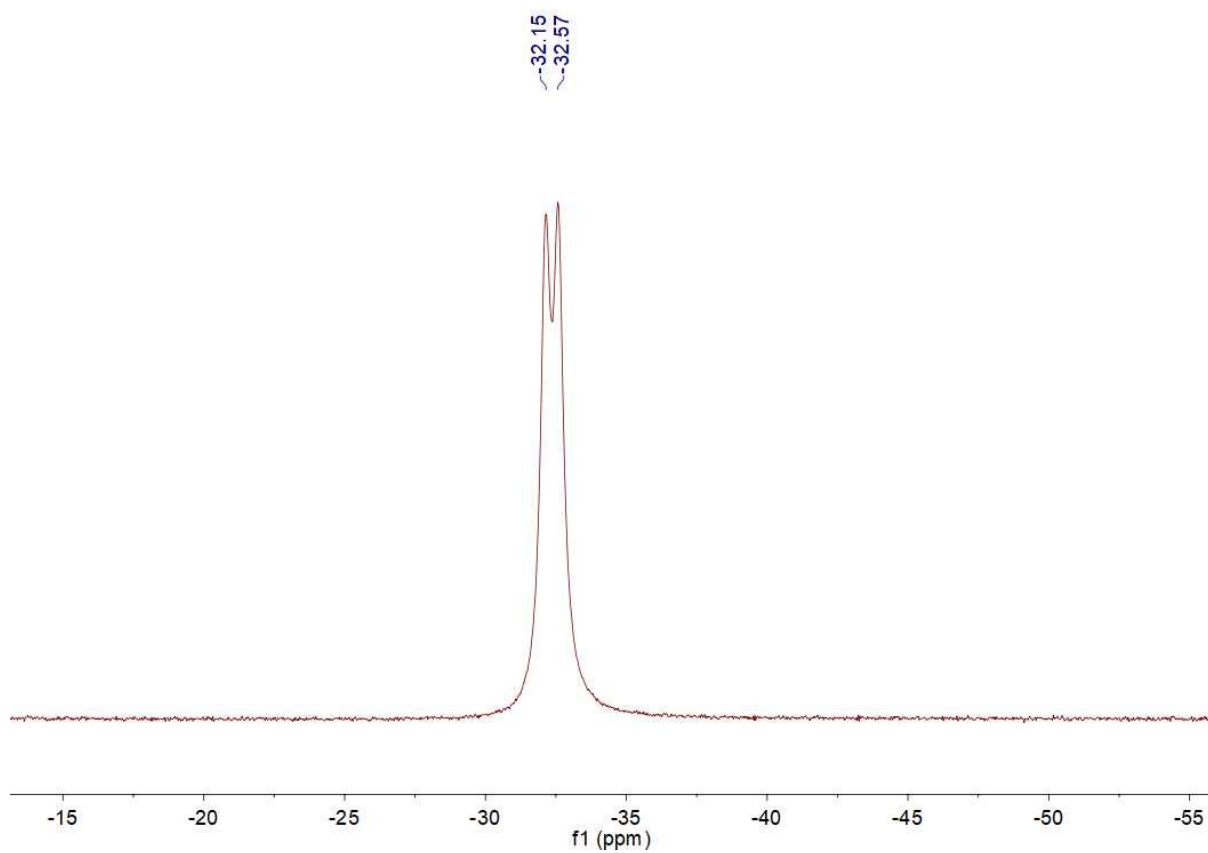

**Figure S8.**  $^{31}\text{P}\{^1\text{H}\}$  NMR spectrum of **3** in  $d_8$ -THF.

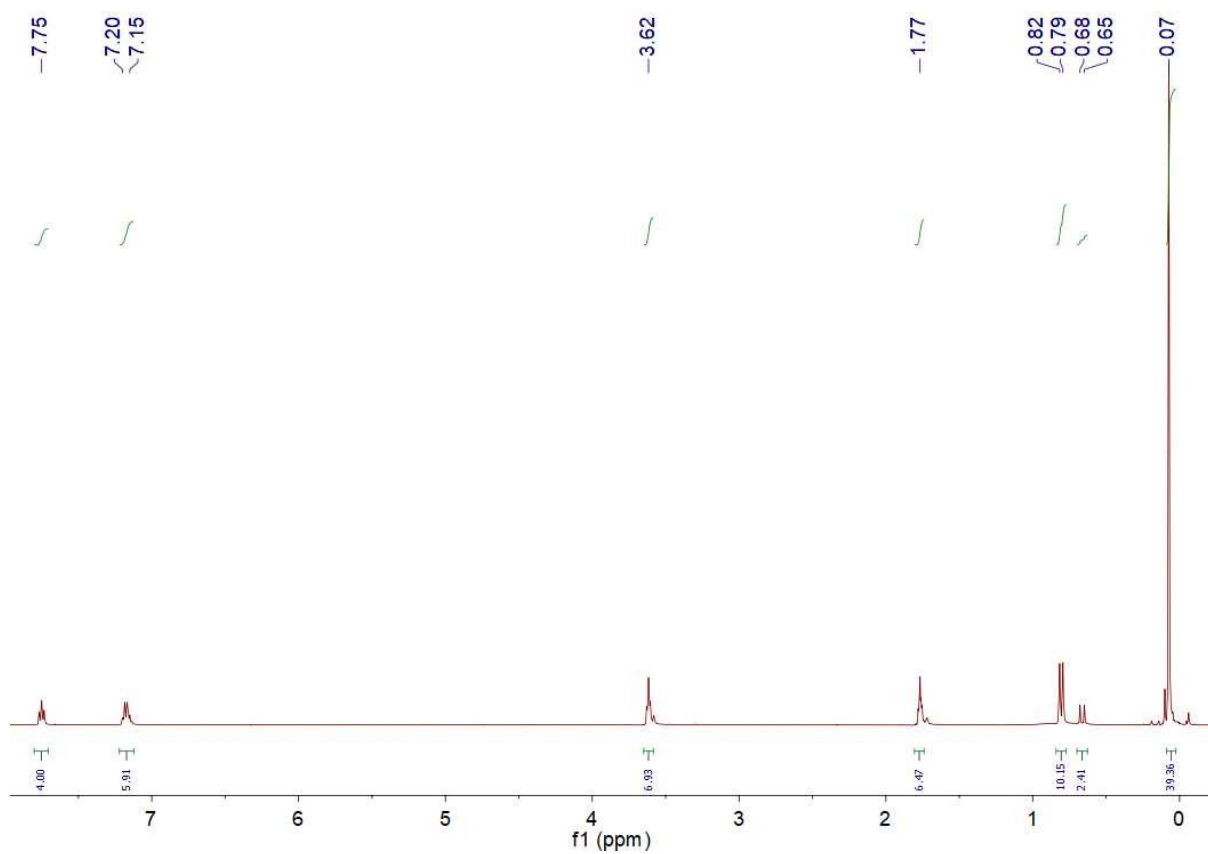

**Figure S9.**  $^1\text{H}\{^{11}\text{B}\}$  NMR spectrum of **4** in  $d_8$ -THF.

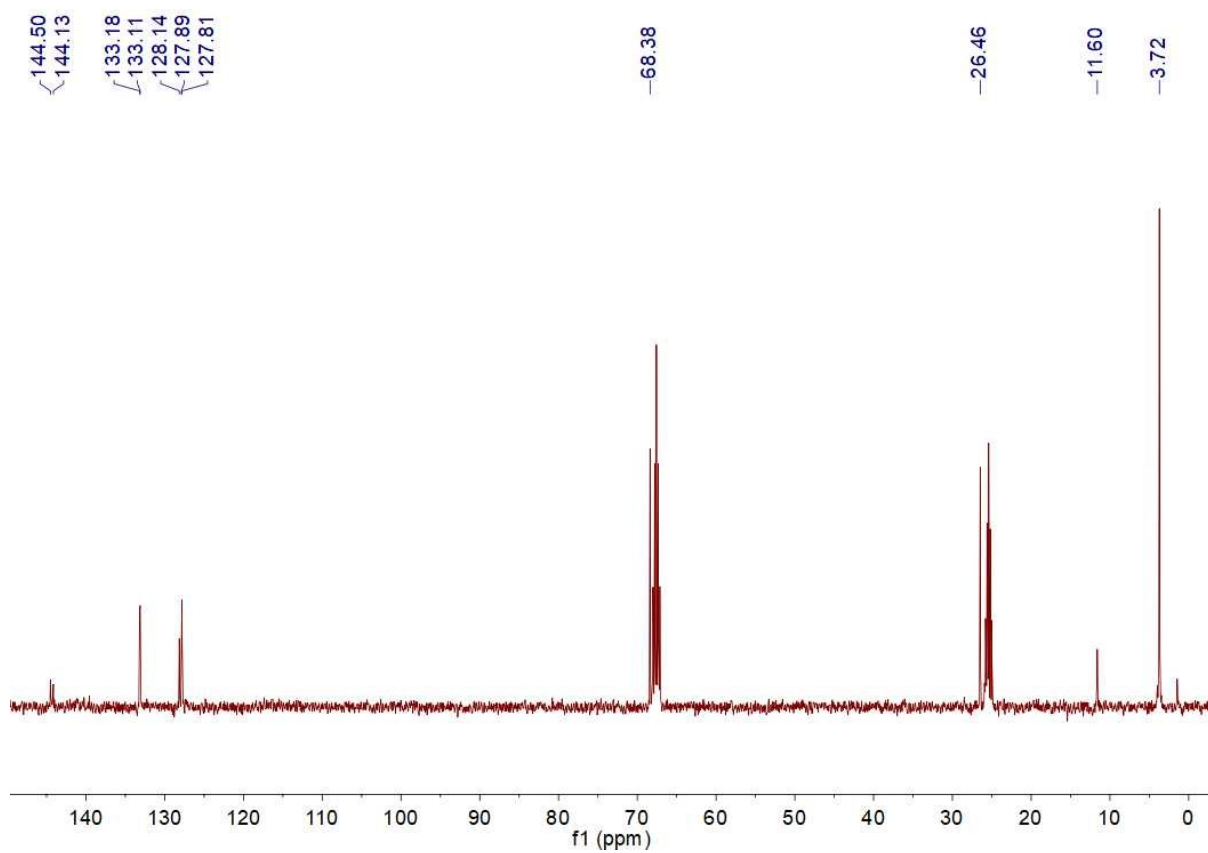

**Figure S10.**  $^{13}\text{C}\{^1\text{H}\}$  NMR spectrum of **4** in  $d_8$ -THF.

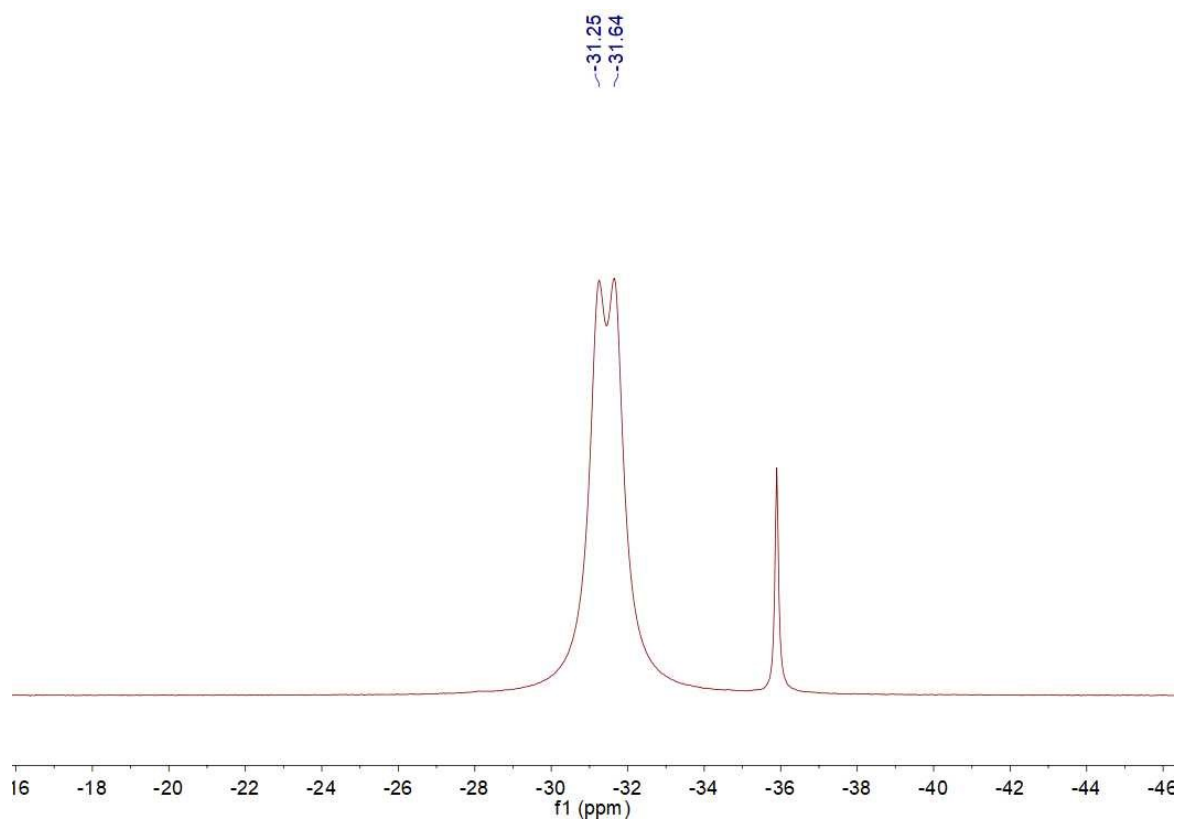

**Figure S11.**  $^{11}\text{B}\{^1\text{H}\}$  NMR spectrum of **4** in  $d_8$ -THF (the signal at -36 ppm is due to a minor impurity).

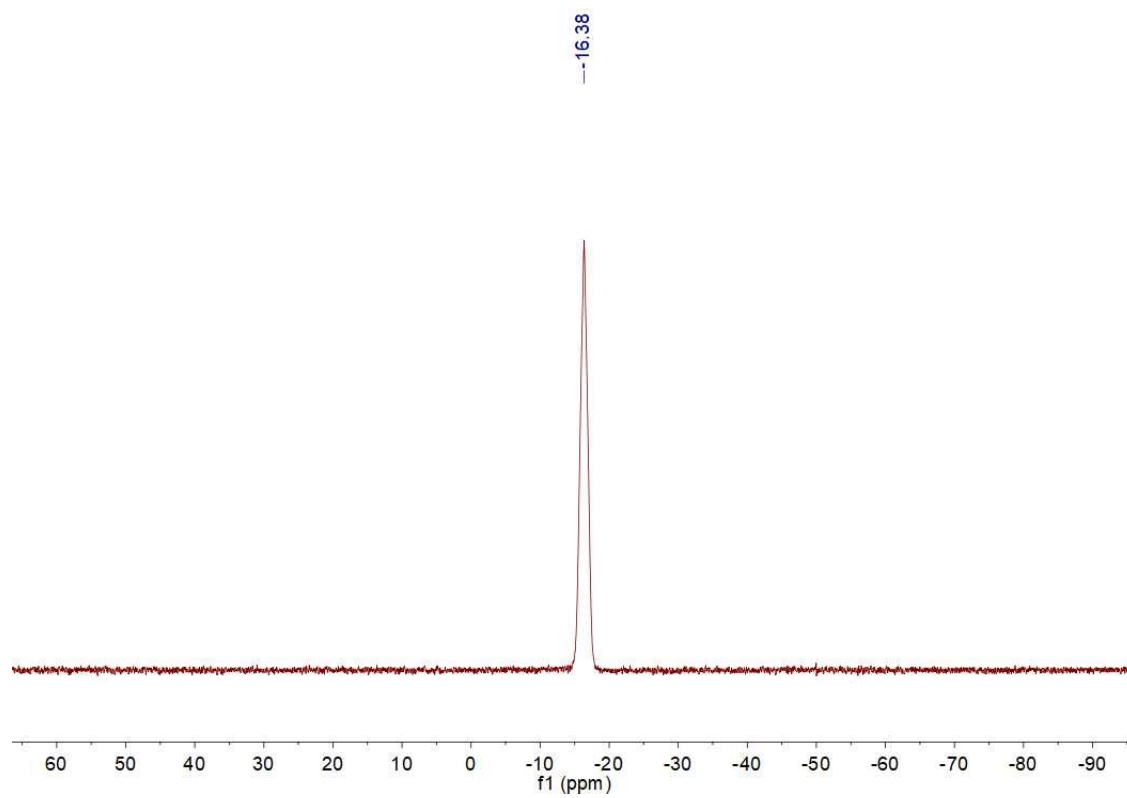

**Figure S12.**  $^{31}\text{P}\{^1\text{H}\}$  NMR spectrum of **4** in  $d_8$ -THF.





**Table S1. Crystallographic data for 2a, 2b, 2c, 3, and 4.**

| Compound                     | <b>2a</b>                                                                                                                          | <b>2b</b>                                                                                                                                                                         | <b>2c</b>                                                                                                                                                                          | <b>3</b>                                                                                       | <b>4</b>                                                                                        |
|------------------------------|------------------------------------------------------------------------------------------------------------------------------------|-----------------------------------------------------------------------------------------------------------------------------------------------------------------------------------|------------------------------------------------------------------------------------------------------------------------------------------------------------------------------------|------------------------------------------------------------------------------------------------|-------------------------------------------------------------------------------------------------|
| CCDC reference               | 2023940                                                                                                                            | 2023941                                                                                                                                                                           | 2023942                                                                                                                                                                            | 2023944                                                                                        | 2023943                                                                                         |
| formula                      | C <sub>42</sub> H <sub>92</sub> B <sub>4</sub> MgO <sub>4</sub> P <sub>2</sub> Si <sub>4</sub><br>·C <sub>4</sub> H <sub>8</sub> O | C <sub>24</sub> H <sub>48</sub> MgO <sub>6</sub> <sup>2+</sup><br>·2C <sub>13</sub> H <sub>30</sub> B <sub>2</sub> PSi <sub>2</sub> <sup>-</sup> ·C <sub>4</sub> H <sub>8</sub> O | C <sub>24</sub> H <sub>48</sub> MgO <sub>6</sub> <sup>2+</sup><br>·2C <sub>13</sub> H <sub>30</sub> B <sub>2</sub> PSi <sub>2</sub> <sup>-</sup> ·2C <sub>4</sub> H <sub>8</sub> O | C <sub>42</sub> H <sub>92</sub> B <sub>4</sub> CaO <sub>4</sub> P <sub>2</sub> Si <sub>4</sub> | C <sub>42</sub> H <sub>92</sub> B <sub>4</sub> O <sub>4</sub> P <sub>2</sub> Si <sub>4</sub> Sr |
| <i>M</i> <sub>w</sub>        | 975.10                                                                                                                             | 1119.31                                                                                                                                                                           | 1191.41                                                                                                                                                                            | 918.77                                                                                         | 966.31                                                                                          |
| cryst. size /mm <sup>3</sup> | 0.30 × 0.10 × 0.10                                                                                                                 | 0.30 × 0.27 × 0.24                                                                                                                                                                | 0.25 × 0.22 × 0.20                                                                                                                                                                 | 0.42 × 0.20 × 0.05                                                                             | 0.10 × 0.02 × 0.005                                                                             |
| crystal system               | monoclinic                                                                                                                         | monoclinic                                                                                                                                                                        | triclinic                                                                                                                                                                          | orthorhombic                                                                                   | orthorhombic                                                                                    |
| space group                  | <i>C2/c</i>                                                                                                                        | <i>P2<sub>1</sub>/c</i>                                                                                                                                                           | <i>P</i> $\bar{1}$                                                                                                                                                                 | <i>Pbca</i>                                                                                    | <i>Pbca</i>                                                                                     |
| <i>a</i> /Å                  | 19.5728(3)                                                                                                                         | 13.2927(5)                                                                                                                                                                        | 11.1332(7)                                                                                                                                                                         | 15.9886(5)                                                                                     | 16.342(10)                                                                                      |
| <i>b</i> /Å                  | 25.8266(3)                                                                                                                         | 11.0851(4)                                                                                                                                                                        | 11.8801(10)                                                                                                                                                                        | 11.9737(4)                                                                                     | 12.080(7)                                                                                       |
| <i>c</i> /Å                  | 14.1712(2)                                                                                                                         | 23.1860(9)                                                                                                                                                                        | 15.3074(13)                                                                                                                                                                        | 29.3298(8)                                                                                     | 30./005(19)                                                                                     |
| $\alpha$ /°                  |                                                                                                                                    |                                                                                                                                                                                   | 71.516(7)                                                                                                                                                                          |                                                                                                |                                                                                                 |
| $\beta$ /°                   | 121.729(2)                                                                                                                         | 91.103(4)                                                                                                                                                                         | 85.080(6)                                                                                                                                                                          |                                                                                                |                                                                                                 |
| $\gamma$ /°                  |                                                                                                                                    |                                                                                                                                                                                   | 70.545(7)                                                                                                                                                                          |                                                                                                |                                                                                                 |
| <i>V</i> /Å <sup>3</sup>     | 6092.90(18)                                                                                                                        | 3415.8(2)                                                                                                                                                                         | 1810.1(3)                                                                                                                                                                          | 5615.0(3)                                                                                      | 5923(6)                                                                                         |

|                                              |             |             |             |             |             |
|----------------------------------------------|-------------|-------------|-------------|-------------|-------------|
| <i>Z</i>                                     | 4           | 2           | 1           | 4           | 4           |
| $\mu$ /mm <sup>-1</sup>                      | 1.782       | 0.186       | 0.180       | 0.288       | 1.084       |
| reflections measured                         | 8741        | 13948       | 10838       | 26273       | 14418       |
| unique reflections                           | 4732        | 6567        | 6867        | 6252        | 4839        |
| $R_{\text{int}}$                             | 0.0162      | 0.0246      | 0.0255      | 0.0482      | 0.1191      |
| refined parameters                           | 289         | 425         | 425         | 375         | 375         |
| $R$ (on $F$ , $F^2 > 2\sigma$ )              | 0.0342      | 0.0344      | 0.0425      | 0.0391      | 0.0767      |
| $R_w$ (on $F^2$ , all data)                  | 0.0959      | 0.0861      | 0.1079      | 0.0905      | 0.2032      |
| goodness of fit on $F^2$                     | 1.054       | 0.970       | 1.035       | 0.884       | 1.024       |
| max, min electron density /e Å <sup>-3</sup> | 0.29, -0.26 | 0.36, -0.26 | 0.39, -0.25 | 0.29, -0.26 | 0.50, -0.34 |

---
